# Supplementary material
Source: PubMed Central journal article supplement (PMC7648347)
Supplement: ONCO-25-927-s002.pdf [file ONCO-25-927-s002.pdf]

Supplemental Table for:

The Predictive Value of Early Changes in 18F-Fluoroestradiol PET/CT during Fulvestrant 500 mg Therapy in Patients with ER-positive Metastatic Breast Cancer

ZhiMing Shao et al.

**Supplementary Table 1. FES-PET results and clinical outcomes in individual patients.  
+ongoing.**

| Patient | Tumor sites | No. of lesions (n) | FES heterogeneity | Measurable disease | Baseline SUVmax | PFS (mo) |
|---------|-------------|--------------------|-------------------|--------------------|-----------------|----------|
| 1       | breast      | 2                  | No                | Yes                | 5.85            | 8.9      |
|         | lymph node  | 3                  |                   |                    |                 |          |
| 2       | breast      | 2                  | No                | Yes                | 9.48            | 6.6      |
|         | lymph node  | 2                  |                   |                    |                 |          |
|         | bone        | 5                  |                   |                    |                 |          |
| 3       | lung        | 1                  | Yes               | Yes                | 6.45            | 5.0      |
|         | lymph node  | 4                  |                   |                    |                 |          |
| 4       | lung        | 1                  | No                | Yes                | 12.05           | 14.3+    |
| 5       | soft tissue | 1                  | No                | No                 | 9.51            | 5.7      |
|         | lymph node  | 3                  |                   |                    |                 |          |
|         | lung        | 1                  |                   |                    |                 |          |
| 6       | bone        | 8                  | No                | Yes                | 3.49            | 9.5      |
|         | breast      | 1                  |                   |                    |                 |          |
| 7       | lymph node  | 3                  | No                | Yes                | 11.81           | 16.2+    |
|         | breast      | 1                  |                   |                    |                 |          |
| 8       | bone        | 4                  | No                | Yes                | 3.25            | 15.2+    |
|         | soft tissue | 1                  |                   |                    |                 |          |
| 9       | bone        | 2                  | No                | Yes                | 20.09           | 14.6     |
|         | pleura      | 1                  |                   |                    |                 |          |
|         | lymph node  | 4                  |                   |                    |                 |          |
| 10      | bone        | 3                  | Yes               | Yes                | 3.76            | 13.1     |
|         | breast      | 1                  |                   |                    |                 |          |
|         | lymph node  | 2                  |                   |                    |                 |          |
| 11      | bone        | 16                 | No                | No                 | 7.72            | 15.9+    |
|         | lymph node  | 2                  |                   |                    |                 |          |
| 12      | bone        | 23                 | Yes               | No                 | 32.37           | 7.7      |
|         | lymph node  | 2                  |                   |                    |                 |          |
| 13      | bone        | 4                  | No                | No                 | 17.74           | 18.1+    |
|         | lymph node  | 2                  |                   |                    |                 |          |
| 14      | bone        | 13                 | No                | No                 | 7.35            | 12.1+    |
|         | lymph node  | 3                  |                   |                    |                 |          |
| 15      | bone        | 1                  | Yes               | Yes                | 2.89            | 19.4+    |
|         | lung        | 1                  |                   |                    |                 |          |
|         | Lymph node  | 2                  |                   |                    |                 |          |
| 16      | pleura      | 1                  | Yes               | Yes                | 6.94            | 18.5     |
|         | lung        | 3                  |                   |                    |                 |          |
|         | lymph node  | 2                  |                   |                    |                 |          |
| 17      | bone        | 7                  | No                | Yes                | 4.18            | 16.6+    |
|         | pleura      | 3                  |                   |                    |                 |          |
| 18      | bone        | 7                  | No                | Yes                | 6.69            | 5.0+     |
|         | lymph node  | 10                 |                   |                    |                 |          |
|         | lung        | 2                  |                   |                    |                 |          |

|    |             |    |     |     |       |       |
|----|-------------|----|-----|-----|-------|-------|
| 19 | lymph node  | 1  | No  | No  | 2.69  | 1.8   |
|    | bone        | 2  |     |     |       |       |
| 20 | lung        | 1  | No  | No  | 12.32 | 12.4  |
|    | bone        | 4  |     |     |       |       |
| 21 | breast      | 1  | Yes | Yes | 6.73  | 1.8   |
|    | lymph node  | 4  |     |     |       |       |
|    | lung        | 1  |     |     |       |       |
|    | bone        | 1  |     |     |       |       |
| 22 | lymph node  | 6  | No  | Yes | 15.13 | 12.8  |
|    | bone        | 5  |     |     |       |       |
| 23 | lymph node  | 4  | Yes | No  | 8.91  | 7.2   |
|    | bone        | 5  |     |     |       |       |
| 24 | bone        | 7  | Yes | No  | 3.58  | 3.5   |
| 25 | lymph node  | 7  | No  | Yes | 15.98 | 9.3+  |
| 26 | lymph node  | 2  | No  | Yes | 2.65  | 11.4  |
| 27 | bone        | 3  | No  | No  | 3.09  | 10.3  |
| 28 | breast      | 1  | Yes | Yes | 3.25  | 16.9+ |
|    | bone        | 1  |     |     |       |       |
| 29 | lymph node  | 8  | No  | No  | 15.06 | 11.7+ |
|    | bone        | 25 |     |     |       |       |
|    | lung        | 1  |     |     |       |       |
| 30 | breast      | 1  | No  | Yes | 6.71  | 11.9+ |
|    | lymph node  | 5  |     |     |       |       |
| 31 | soft tissue | 2  | Yes | No  | 3.87  | 3.3   |
|    | Lymph node  | 2  |     |     |       |       |
|    | pleura      | 1  |     |     |       |       |
|    | bone        | 5  |     |     |       |       |
| 32 | lymph node  | 2  | No  | No  | 9.81  | 28.0  |
|    | pleura      | 1  |     |     |       |       |
| 33 | lymph node  | 3  | No  | Yes | 6.48  | 6.3+  |
|    | lung        | 6  |     |     |       |       |
| 34 | soft tissue | 1  | No  | Yes | 7.97  | 5.6+  |
|    | lymph node  | 1  |     |     |       |       |
|    | peritoneum  | 1  |     |     |       |       |
|    | lung        | 2  |     |     |       |       |
| 35 | bone        | 21 | No  | No  | 22.83 | 12.1+ |
| 36 | lymph node  | 2  | No  | No  | 4.64  | 10.9+ |

---
